# Supplementary material for: Molybdenum-Induced Regulation of Antioxidant Defense-Mitigated Cadmium Stress in Aromatic Rice and Improved Crop Growth, Yield, and Quality Traits
Source: MDPI journal article supplement (doi:10.3390/antiox10060838), 2021-05-24
Supplement: s1 [file s1]

**Supplementary Figure S1:**

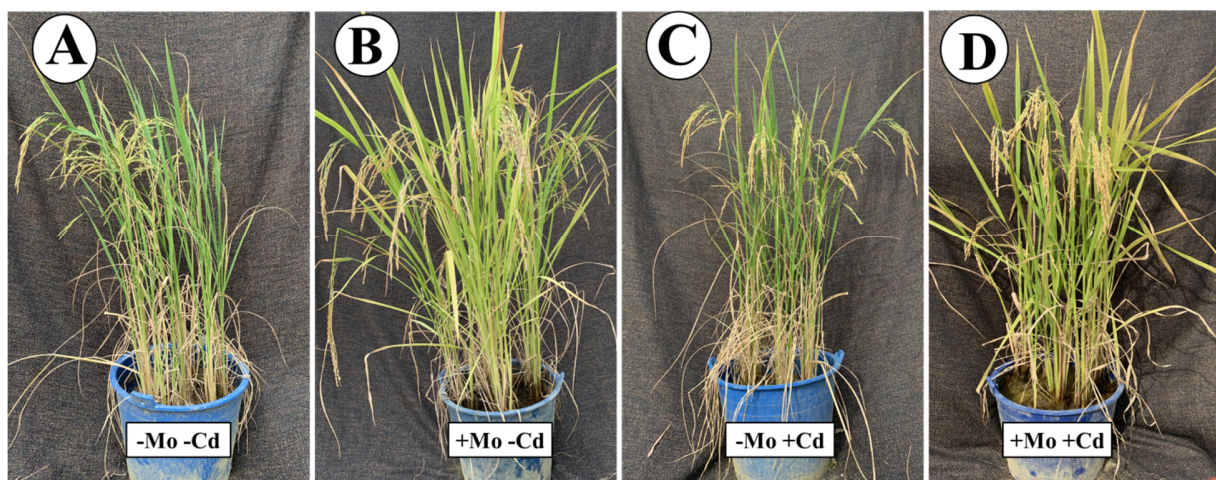

Pictorial view of aromatic rice plants grown under molybdenum (Mo) and cadmium (Cd) treatments. The treatment combinations represent as: -Mo-Cd: 0 and 0 mg, +Mo-Cd: 0.15 and 0 mg, -Mo+Cd: 0 and 100 mg, +Mo+Cd: 0.15 and 100 mg of Mo and Cd per kg of soil respectively. The molybdenum was supplied as ammonium molybdate  $[(\text{NH}_4)_6\text{Mo}_7\text{O}_{24}\cdot 4\text{H}_2\text{O}]$  and Cd as  $\text{CdCl}_2\cdot 2.5\text{H}_2\text{O}$  per kg of soil.

**Supplementary Table S1:** The experimental soil's chemical properties

| Properties                          | Contents |
|-------------------------------------|----------|
| O.M. (g kg <sup>-1</sup> )          | 20.32    |
| Total N (g kg <sup>-1</sup> )       | 1.26     |
| Total P (g kg <sup>-1</sup> )       | 0.87     |
| Total K (g kg <sup>-1</sup> )       | 16.94    |
| pH                                  | 5.61     |
| Available N (mg kg <sup>-1</sup> )  | 85.28    |
| Available P (mg kg <sup>-1</sup> )  | 9.25     |
| Available K (mg kg <sup>-1</sup> )  | 118.39   |
| Available Mo (mg kg <sup>-1</sup> ) | 0.072    |
| Cd (mg kg <sup>-1</sup> )           | 2.13     |

**Supplementary Table S2:** Primer sequences used for qRT-PCR amplification

| Accession no.       | Genes        | Strand | primer sequences 5' to 3'                     | Annealing temperature (T <sub>m</sub> ) |
|---------------------|--------------|--------|-----------------------------------------------|-----------------------------------------|
| <i>Os07g0694700</i> | <i>APX</i>   | F<br>R | TACGCCGACTTCTACCAGC<br>TTTATTACAACCGCCACGA    | 58 °C                                   |
| <i>Os06g51150</i>   | <i>CAT</i>   | F<br>R | GCACAGTTTGACAGGGAG<br>GTCTTTGGACTTGGCTTG      | 56 °C                                   |
| <i>Os10g0109600</i> | <i>POD</i>   | F<br>R | CGACGATTTCTACGACTACAT<br>TGATTGAGGAGGTTCTGGT  | 57 °C                                   |
| <i>Os07g0665200</i> | <i>SOD</i>   | F<br>R | TGTCAACTGGACCACACTTC<br>ACTTAAAACGCATGCACTCA  | 55 °C                                   |
| <i>Os03g50885</i>   | <i>ACTIN</i> | F<br>R | TGCCAAGGCTGAGTACGACGA<br>CAAGCAGGAGGACGGCGATA | 57 °C                                   |

**Supplementary Table S3:** Influence of molybdenum supplementation and cadmium toxicity on Mo and Cd concentration at different growth stages in leaves, ears and grains of aromatic rice

| Growth stages      | Cd toxicity | Mo supply | Cd concentration in leaves ( $\mu\text{g g}^{-1}$ DW) | Cd concentration in ears/grains ( $\mu\text{g g}^{-1}$ DW) | Mo concentration in leaves ( $\mu\text{g g}^{-1}$ DW) | Mo concentration in ears/grains ( $\mu\text{g g}^{-1}$ DW) |
|--------------------|-------------|-----------|-------------------------------------------------------|------------------------------------------------------------|-------------------------------------------------------|------------------------------------------------------------|
| Vegetative stage   | -Cd         | -Mo       | $0.42 \pm 0.04^c$                                     | -                                                          | $0.095 \pm 0.008^c$                                   | -                                                          |
|                    |             | +Mo       | $0.28 \pm 0.02^c$                                     | -                                                          | $0.220 \pm 0.017^b$                                   | -                                                          |
|                    | +Cd         | -Mo       | $11.41 \pm 1.21^a$                                    | -                                                          | $0.127 \pm 0.006^c$                                   | -                                                          |
|                    |             | +Mo       | $7.70 \pm 0.69^b$                                     | -                                                          | $0.275 \pm 0.020^a$                                   | -                                                          |
| Reproductive stage | -Cd         | -Mo       | $0.49 \pm 0.03^c$                                     | $0.019 \pm 0.001^c$                                        | $0.134 \pm 0.008^b$                                   | $0.034 \pm 0.003^b$                                        |
|                    |             | +Mo       | $0.30 \pm 0.02^c$                                     | $0.012 \pm 0.001^c$                                        | $0.266 \pm 0.019^a$                                   | $0.074 \pm 0.005^a$                                        |
|                    | +Cd         | -Mo       | $16.56 \pm 1.91^a$                                    | $0.546 \pm 0.055^a$                                        | $0.149 \pm 0.016^b$                                   | $0.041 \pm 0.003^b$                                        |
|                    |             | +Mo       | $10.53 \pm 0.95^b$                                    | $0.408 \pm 0.027^b$                                        | $0.317 \pm 0.022^a$                                   | $0.087 \pm 0.005^a$                                        |
| Maturity stage     | -Cd         | -Mo       | $0.48 \pm 0.04^c$                                     | $0.009 \pm 0.001^c$                                        | $0.079 \pm 0.004^b$                                   | $0.042 \pm 0.003^b$                                        |
|                    |             | +Mo       | $0.35 \pm 0.04^c$                                     | $0.005 \pm 0.000^c$                                        | $0.296 \pm 0.035^a$                                   | $0.081 \pm 0.005^a$                                        |
|                    | +Cd         | -Mo       | $19.82 \pm 2.43^a$                                    | $0.328 \pm 0.029^a$                                        | $0.101 \pm 0.006^b$                                   | $0.048 \pm 0.004^b$                                        |
|                    |             | +Mo       | $14.89 \pm 1.64^b$                                    | $0.230 \pm 0.022^b$                                        | $0.335 \pm 0.033^a$                                   | $0.088 \pm 0.008^a$                                        |

-Mo and +Mo denote 0 and 0.15 mg of molybdenum supplied as ammonium molybdate  $[(\text{NH}_4)_6\text{Mo}_7\text{O}_{24} \cdot 4\text{H}_2\text{O}]$ , whilst -Cd and +Cd denote 0 and 100 mg of cadmium supplied as cadmium chloride  $(\text{CdCl}_2 \cdot 2.5\text{H}_2\text{O})$  per kg soil, respectively. The numeric values reflect means from four independent replicates ( $\pm$  S.E.) with different treatments. Data presented in individual columns indicated with dissimilar letters differ significantly by LSD test at  $p < 0.05$ .
